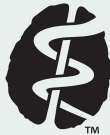

## Officers 2021–2022

### President

Vivian B. Pender, M.D.

### President-Elect

Rebecca W. Brendel, M.D., J.D.

### Treasurer

Richard F. Summers, M.D.

### Secretary

Sandra M. DeJong, M.D., M.Sc.

### Assembly

#### Speaker

Mary Jo Fitz-Gerald, M.D, M.B.A.

#### Speaker-Elect

Adam Nelson, M.D.

#### Recorder

Vasilis K. Pozios, M.D.

### Office of the CEO and Medical Director

#### CEO and Medical Director

Saul Levin, M.D., M.P.A., F.R.C.P.-E.

### Board of Trustees

Elie G. Aoun, M.D., M.R.O.

Jenny L. Boyer, M.D., Ph.D., J.D.

Kenneth Certa, M.D.

Jaffrey L. Geller, M.D., M.P.H.

Glenn A. Martin, M.D.

Eric M. Plakun, M.D.

Michele Reid, M.D.

Mary Hasbah Roessel, M.D.

Bruce J. Schwartz, M.D.

Altha J. Stewart, M.D.

Felix Torres, M.D., M.B.A.

Sanya Virani, M.D., M.P.H.

Cheryl D. Wills, M.D.

Urooj Yazdani, M.D.

Melinda Young, M.D.

## Editorial Board

### Editor-in-Chief

Ned H. Kalin, M.D.

### Deputy Editors

Elisabeth Binder, M.D., Ph.D.

Kathleen T. Brady, M.D., Ph.D.

David A. Lewis, M.D.

Daniel S. Pine, M.D.

Carolyn Rodriguez, M.D., Ph.D.

Madhukar Trivedi, M.D.

### Associate Editors

Olusola Ajilore, M.D., Ph.D.

Huda Akil, Ph.D.

Melissa Arbuckle, M.D., Ph.D.

Eraka P.J. Bath, M.D.

Alan Brown, M.D., M.P.H.

Tyrone Cannon, Ph.D.

Karl Deisseroth, M.D., Ph.D.

Benjamin G. Druss, M.D., M.P.H.

Javier I. Escobar, M.D., M.Sc.

Julie L. Fudge, M.D.

Qiyong Gong, M.D., Ph.D.

Raquel E. Gur, M.D., Ph.D.

Helena Hansen, M.D., Ph.D.

David C. Henderson, M.D.

Yasmin Hurd, Ph.D.

Clinton D. Kilts, Ph.D.

Carlos López Jaramillo, M.D., M.Sc., Ph.D.

Joan L. Luby, M.D.

John C. Markowitz, M.D.

Helen S. Mayberg, M.D., F.R.C.P.C.

Terrie E. Moffitt, Ph.D.

Charles B. Nemeroff, M.D., Ph.D.

Roy Perlis, M.D.

Diego A. Pizzagalli, Ph.D.

Bryan L. Roth, M.D., Ph.D.

Alan F. Schatzberg, M.D.

Dikoma C. Shungu, Ph.D.

Anita Thapar, M.B.B.Ch., F.R.C.Psych.,

Ph.D., F.Med.Sci.

Mauricio Tohen, M.D., Dr.PH., M.B.A.

Giulio Tononi, M.D., Ph.D.

Nim Tottenham, Ph.D.

John T. Walkup, M.D.

### Editors Emeriti

Nancy C. Andreasen, M.D., Ph.D.

Robert Freedman, M.D.

### Former Editors

Amariah Brigham, M.D., 1844–1849

T. Romeyn Beck, M.D., 1849–1854

John P. Gray, M.D., 1854–1886

G. Alder Blumer, M.D., 1886–1894

Richard Dewey, M.D., 1894–1897

Henry M. Hurd, M.D., 1897–1904

Edward N. Brush, M.D., 1904–1931

Clarence B. Farrar, M.D., 1931–1965

Francis J. Braceland, M.D., 1965–1978

John C. Nemiah, M.D., 1978–1993

### Editorial Staff

#### Executive Editor

Michael D. Roy

#### Senior Editor

John J. Guardiano, Ph.D.

#### Production Manager

Susan Westrate

#### Staff Editors

Angela Moore

#### Editorial Support Services Manager

Heidi Koch-Bubel

#### Editorial Assistant

Linda LaCour

#### Editorial Assistant/Permissions

##### Coordinator

Megan Conley

### Publisher

John McDuffie
