# The American Journal of Psychiatry

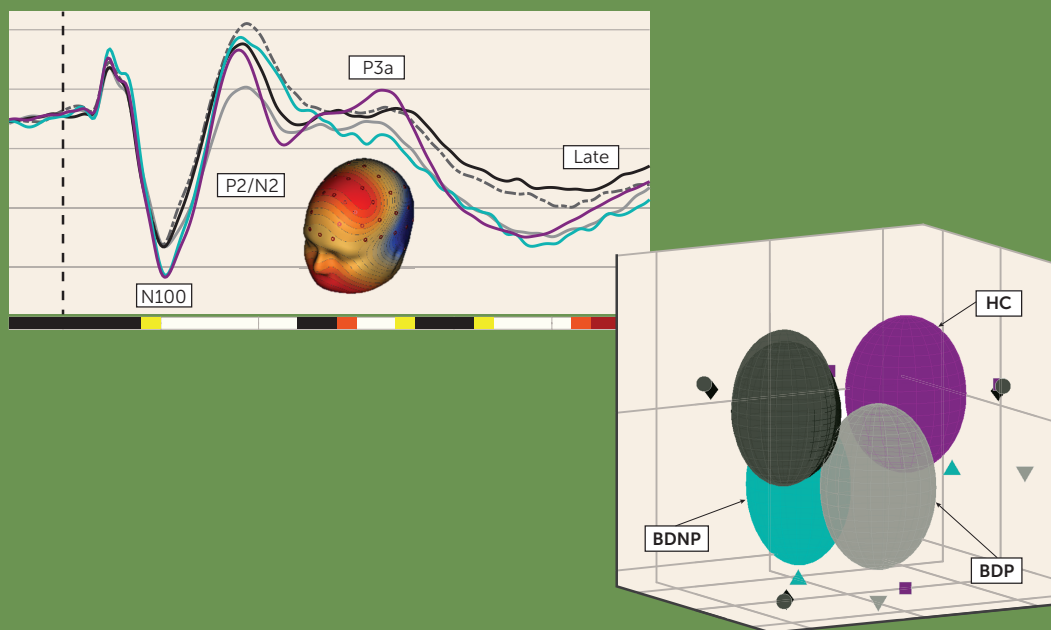

Auditory Oddball Responses Across the Schizophrenia-Bipolar Spectrum and Their Relationship to Cognitive and Clinical Features

Incident Major Depressive Disorder Predicted by Three Measures of Insulin Resistance

Lyme Borreliosis and Associations With Mental Disorders and Suicidal Behavior

Differences in Antipsychotic Treatment Discontinuation Among Veterans With Schizophrenia in the U.S. Department of Veterans Affairs
