Coming March 2022!

# Diagnostic and Statistical Manual of Mental Disorders, Fifth Edition, Text Revision (DSM-5-TR™)

American Psychiatric Association

The *Diagnostic and Statistical Manual of Mental Disorders*, Fifth Edition, Text Revision (DSM-5-TR), is the most comprehensive, current, and critical resource for clinical practice available to today's mental health clinicians and researchers. DSM-5-TR includes the fully revised text and references, updated diagnostic criteria and ICD-10-CM codes since DSM-5 was published in 2013. It features a new disorder, Prolonged Grief Disorder, as well as codes for suicidal behavior available to all clinicians of any discipline without the requirement of any other diagnosis.

With contributions from over 200 subject matter experts, this updated volume boasts the most current text updates based on the scientific literature. Now in four-color and with the ability to authenticate each printed copy, DSM-5-TR provides a cohesive, updated presentation of criteria, diagnostic codes, and text. This latest volume offers a common language for clinicians involved in the diagnosis and study of mental disorders and facilitates an objective assessment of symptom presentations across a variety of clinical settings—inpatient, outpatient, partial hospital, consultation-liaison, clinical, private practice, and primary care.

## Stay current with these important updates to DSM-5-TR™:

- Fully revised text for each disorder with updated sections on associated features, prevalence, development and course, risk and prognostic factors, culture, diagnostic markers, suicide, differential diagnosis, and more.
- Addition of Prolonged Grief Disorder (PGD) to Section II—a new disorder for diagnosis
- Over 70 modified criteria sets with helpful clarifications since publication of DSM-5
- Fully updated Introduction and Use of the Manual to guide usage and provide context for important terminology
- Considerations of the impact of racism and discrimination on mental disorders integrated into the text
- New codes to flag and monitor suicidal behavior, available to all clinicians of any discipline and without the requirement of any other diagnosis
- Fully updated ICD-10-CM codes implemented since 2013, including over 50 coding updates new to DSM-5-TR for substance intoxication and withdrawal and other disorders
- Updated and redesigned Diagnostic Classification

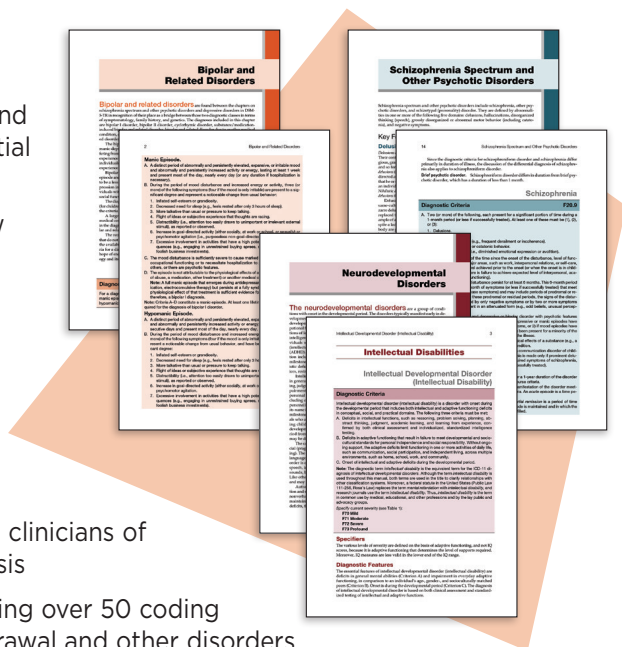

This manual is a valuable resource for other physicians and health professionals, including psychologists, counselors, nurses, and occupational and rehabilitation therapists, as well as social workers and forensic and legal specialists. The new DSM-5-TR is the most definitive resource for the diagnosis and classification of mental disorders.

2022 • 1,250 pages • ISBN 978-0-89042-575-6 • Hardcover • \$220.00 • Item #2575

2022 • 1,250 pages • ISBN 978-0-89042-576-3 • Paperback • \$170.00 • Item #2576

2022 • 1,250 pages • ISBN 978-0-89042-577-0 • eBook • \$136.00 • Item #2577

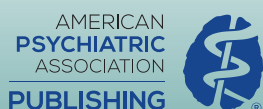

20% Discount for American Psychiatric Association Members  
25% Discount for APA Resident-Fellow Members

▶ ORDER @ [www.appi.org](http://www.appi.org) | Email: [appi@psych.org](mailto:appi@psych.org) | Toll Free: 1-800-368-5777

# The American Journal of Psychotherapy

APA's journal of psychotherapy practice and research

Since 1947, the *American Journal of Psychotherapy* has provided a forum for advancing the theory, science, and clinical practice of psychotherapy, publishing articles that expand understanding of psychotherapies, especially in the domains of efficacy, process, education, and practice. The journal provides authors and readers the opportunity to engage fully in pressing psychotherapy issues such as defining core elements of psychotherapies, dissemination of evidence-based practices, scaling best practices for expansion to larger populations, understanding mechanisms of change, and evaluating best practices for psychotherapy training and supervision. From its new home as part of APA Publishing's portfolio of journals, the *American Journal of Psychotherapy* is the ideal vehicle to disseminate knowledge about psychotherapy and send a message that psychotherapy remains firmly within the purview of psychiatry.

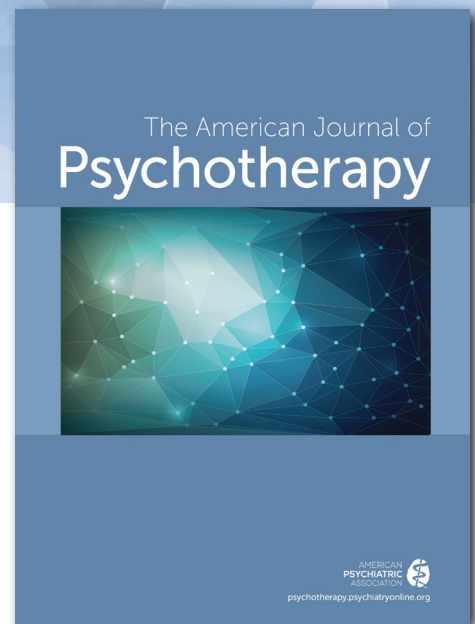

Holly A. Swartz, M.D., Editor-in-Chief

Frequency: Quarterly  
Online ISSN: 2575-6559  
[psychotherapy.psychiatryonline.org](http://psychotherapy.psychiatryonline.org)

- To receive updates on new content, follow the journal on Twitter (@APAPubJournals) and sign up for free publication alerts at [psychiatryonline.org](http://psychiatryonline.org)
- To see more from the journal, including its entire 70+-year archive or to get information about submitting a paper, visit [www.psychotherapy.psychiatryonline.org](http://www.psychotherapy.psychiatryonline.org)

Check out the most discussed and downloaded papers of those recently published:

- Should Psychotherapy Become a Subspecialty of Psychiatry?
- The Role of Psychotherapy During the COVID-19 Pandemic
- Mass Shootings and Psychotherapy
- Racism: A Challenge for the Therapeutic Dyad

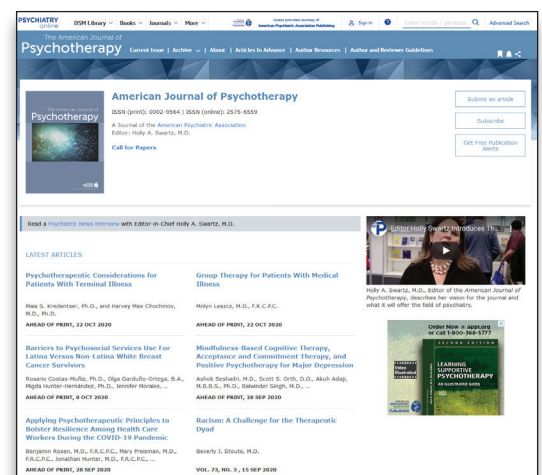

# Dulcan's Textbook of Child and Adolescent Psychiatry, Third Edition

Coming October 2021!

Edited by Mina K. Dulcan, M.D.

Already a foundational resource in the field, *Dulcan's Textbook of Child and Adolescent Psychiatry* has been updated in the third edition, including the latest research and clinical advances. An expanded chapter on telehealth acknowledges the changes and challenges posed by the COVID-19 pandemic and also discusses e-mental health options that support primary care providers, who are often the front line in mental health treatment. Two completely new chapters on pediatric consultation liaison psychiatry examine the history, clinical practice models, scope of interventions, and pharmacological considerations that are relevant to treatment of medically ill children and those seen in primary care—more important than ever, with the significant increase in the number of children with mental health care needs who are seen by pediatricians.

In addition, readers will find thorough, DSM-5-aligned insight from dozens of experts on:

- Neurodevelopmental and other psychiatric disorders, including disorders affecting somatic function, with clinical descriptions, epidemiology, risk factors, diagnosis, treatment options, and more
- A full range of psychosocial treatments, including those focused on both individuals and families, as well as therapeutic milieus and systemic models of care
- The principles and application of psychopharmacology, from antidepressants to antipsychotic medications to mood stabilizers and medications for ADHD
- Specialized issues, including cultural and religious considerations, gender and sexual diversity, and legal and ethical issues

Each chapter features summary points for ease of reference and extensive references for continued study.

Working with young patients, who are changing and evolving with age throughout the course of treatment, and their families presents very real and distinct challenges. This latest edition of *Dulcan's Textbook of Child and Adolescent Psychiatry* provides child and adolescent psychiatrists, pediatricians, family physicians, general psychiatrists, child neurologists, psychologists, advanced practice nurses, psychiatric social workers, and other practitioners the depth and breadth of knowledge needed to treat children and adolescents effectively.

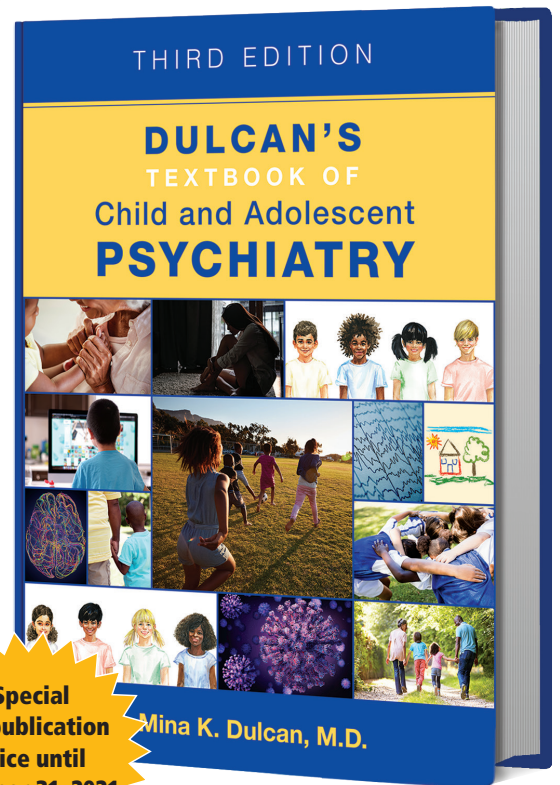

**Special  
Prepublication  
Price until  
October 31, 2021**

**Mina K. Dulcan, M.D.**

2022 • 1,525 pages • ISBN 978-1-61537-327-7 • Hardcover • Special Prepublication Price of \$213.00 until October 31, 2021 (thereafter \$250.00) • Item #37327

2022 • 1,525 pages • ISBN 978-1-61537-399-4 • eBook • \$200.00 • Item #37399

AMERICAN  
PSYCHIATRIC  
ASSOCIATION  
PUBLISHING

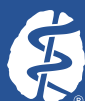

ORDER @ [www.appi.org](http://www.appi.org) | Email: [appi@psych.org](mailto:appi@psych.org) | Toll Free: 1-800-368-5777

20% Discount for American Psychiatric Association Members

25% Discount for APA Resident-Fellow Members

Follow us on  and 

# ▶ PODCASTS from APA Publishing

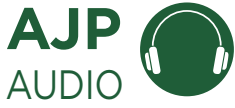

## AJP Audio

Host: Michael D. Roy, Executive Editor, *The American Journal of Psychiatry*

Each episode features an in-depth interview with an author from the most discussed article appearing in the latest issue of *The American Journal of Psychiatry*.

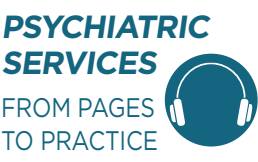

## Psychiatric Services From Pages to Practice

Hosts: Lisa Dixon, M.D., M.P.H., Editor, *Psychiatric Services*, and Josh Berezin, M.D., M.S.

Learn about the latest mental health services research published in *Psychiatric Services* and why it is relevant. Topics include community-based treatment programs, collaborative care, evidence-based treatment and service delivery, criminal and social justice, policy analysis, and more.

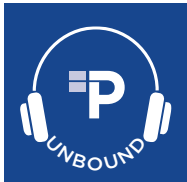

## Psychiatry Unbound

Host: Laura Roberts, M.D., M.A., Editor-in-Chief, APA Publishing Books

APA Publishing's Books podcast offers the opportunity to hear the voices behind the most prominent psychiatric scholarship in the field today. Learn about important topics in the field of psychiatry and see how our authors are making an impact in clinical settings throughout the world.

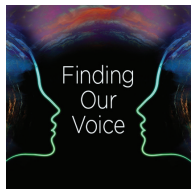

## Finding Our Voice

Host: Sanya Virani, MBBS, MPH

Finding Our Voice brings the viewpoints and opinions of the next generation of psychiatrists—including residents, fellows, and early career psychiatrists—to the forefront. Topics covered include systemic racism and social determinants.

Subscribe Today!

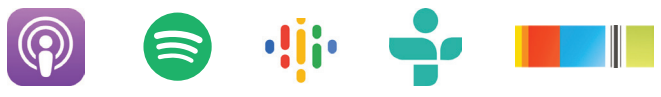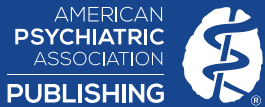

Searching for  
the perfect  
psychiatric  
career?

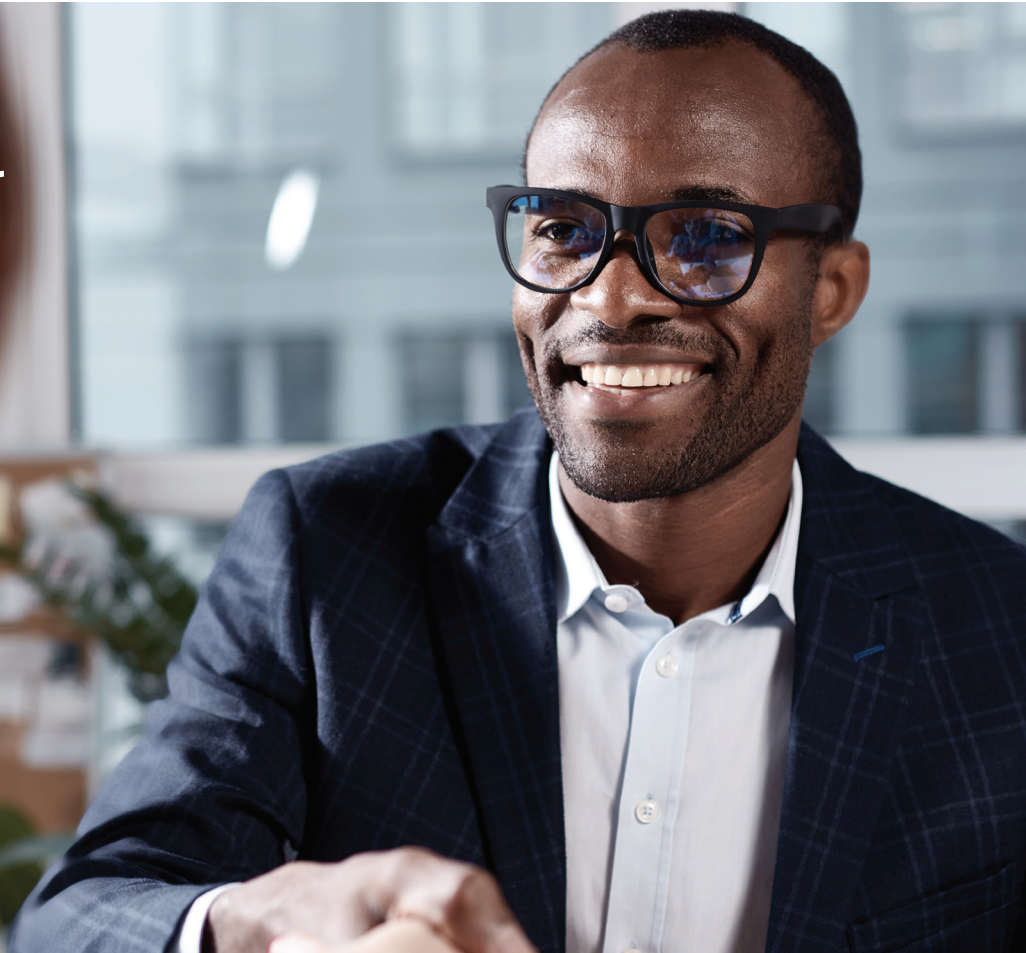

## Let APA JobCentral help!

### Manage Your Career

- Browse hundreds of active job listings!
- Create an account to save jobs, store multiple resumes and cover letters and communicate with employers through our internal messaging system.
- Set up multiple job alerts specifying your skills, interests and location to receive e-mails when employers post jobs that match your criteria.

### Recruit for Open Positions

- Post your job in front of thousands of highly qualified psychiatrists.
- Cross promote your job listing in Psychiatric News.
- Search the anonymous resume database to find your ideal candidate.

AMERICAN  
PSYCHIATRIC  
ASSOCIATION

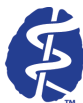

**JOBCENTRAL**  
The Career Hub for Psychiatry

[jobs.psychiatry.org](https://jobs.psychiatry.org)

## Subscription and Business Information

*The American Journal of Psychiatry*, ISSN 0002-953X, is published monthly by the American Psychiatric Association.

The American Psychiatric Association does not hold itself responsible for statements made in its publications by contributors or advertisers. Unless so stated, material in *The American Journal of Psychiatry* does not reflect the endorsement, official attitude, or position of the American Psychiatric Association or of the Journal's Editorial Board.

Periodicals postage paid at Washington, DC, and additional mailing offices. POSTMASTER: Send address changes to *The American Journal of Psychiatry*, Circulation Department, American Psychiatric Association, 800 Maine Avenue, S.W., Suite 900, Washington, D.C. 20024.

### Editorial Office

*American Journal of Psychiatry*  
American Psychiatric Association  
800 Maine Avenue, S.W., Suite 900  
Washington, D.C. 20024  
E-mail: [ajp@psych.org](mailto:ajp@psych.org)

### Customer Service

Phone: (800) 368-5777 (toll-free)  
E-mail: [appi@psych.org](mailto:appi@psych.org)

### APA Member Subscription Services

Phone: (888) 35-PSYCH (toll-free)

### Subscriptions

Regular and resident-fellow members in the U.S. receive print and online access as a **member benefit**. Subscriptions for non-members start at \$362 per year. Online only subscriptions start at \$327 per year. Go to <http://www.appi.org/products> for more information.

Institutional subscriptions are tier priced. For institutional site license or pricing information, contact (202) 559-3729 or [institutions@psych.org](mailto:institutions@psych.org).

*Additional subscription options, including single issues and student rates*

Contact Customer Service

### Advertising

*Pharmaceutical Print and Online Advertising*  
Frank Cox, Kathleen Harrison, Tim Wolfinger  
Pharmaceutical Media, Inc.

30 East 33rd Street  
New York, NY 10016  
Phone: (212) 904-0379  
E-mail: [twolfinger@pminy.com](mailto:twolfinger@pminy.com)

### Nonpharmaceutical and Online Sales

Eamon Wood  
Pharmaceutical Media, Inc.  
E-mail: [ewood@pminy.com](mailto:ewood@pminy.com)  
(see address and phone above).

### Permissions and Reprints

Material published in the journals of the American Psychiatric Association and American Psychiatric Association Publishing is protected by copyright and all rights are reserved. Material may not be reproduced in any form or by any means without written permission from the copyright owner. For permission to reproduce material published by APA, please visit <http://www.appi.org/customer-service/permissions> for more information. Permission can also be secured through the Copyright Clearance Center ([www.copyright.com](http://www.copyright.com)).

APA does not require that permission be obtained for the photocopying of isolated articles for nonprofit classroom or library reserve use; all fees associated with such permission are waived. This consent does not extend to other kinds of copying, such as copying for general distribution, for advertising or promotional purposes, for creating new collective works, or for resale. Requests for commercial distribution and bulk reprints should be directed to (202) 609-7075.

Indexed in Abstracts for Social Workers, Academic Abstracts, Biological Abstracts, Chemical Abstracts, Chicago Psychoanalytic Literature Index, Cumulative Index to Nursing Literature, Excerpta Medica, Hospital Literature Index, Index Medicus, International Nursing Index, Nutrition Abstracts, Psychological Abstracts, Science Citation Index, Social Science Source, and Social Sciences Index.

Pages are produced by KnowledgeWorks Global (Waterbury, VT) and printed by Sheridan NH (Hanover, NH) on acid-free paper effective with Volume 169, Number 1, January 2012.

© 2021 American Psychiatric Association.

**MOVING MEDICINE  
FORWARD,  
ONE INNOVATIVE  
MIND AT A TIME.  
THAT'S THE  
ARMY DIFFERENCE.**

The U.S. Army health care team recruits the brightest students to shape the future of medicine. Through the Health Professions Scholarship Program, we engage the best pre-med students in the nation. If you qualify, not only will the HPSP cover tuition at a medical school of your choice and provide a monthly stipend to help with expenses, but you may be eligible for a signing bonus. That's the Army difference.

Learn more about the Health Professions Scholarship Program at [healthcare.goarmy.com/aqrX](https://healthcare.goarmy.com/aqrX)

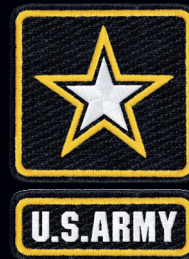

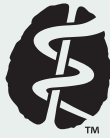

## Officers 2021–2022

### President

Vivian B. Pender, M.D.

### President-Elect

Rebecca W. Brendel, M.D., J.D.

### Treasurer

Richard F. Summers, M.D.

### Secretary

Sandra M. DeJong, M.D., M.Sc.

### Assembly

#### Speaker

Mary Jo Fitz-Gerald, M.D, M.B.A.

#### Speaker-Elect

Adam Nelson, M.D.

#### Recorder

Vasilis K. Pozios, M.D.

### Office of the CEO and Medical Director

#### CEO and Medical Director

Saul Levin, M.D., M.P.A., F.R.C.P.-E.

### Board of Trustees

Elie G. Aoun, M.D., M.R.O.

Jenny L. Boyer, M.D., Ph.D., J.D.

Kenneth Certa, M.D.

Jaffrey L. Geller, M.D., M.P.H.

Glenn A. Martin, M.D.

Eric M. Plakun, M.D.

Michele Reid, M.D.

Mary Hasbah Roessel, M.D.

Bruce J. Schwartz, M.D.

Altha J. Stewart, M.D.

Felix Torres, M.D., M.B.A.

Sanya Virani, M.D., M.P.H.

Cheryl D. Wills, M.D.

Urooj Yazdani, M.D.

Melinda Young, M.D.

## Editorial Board

### Editor-in-Chief

Ned H. Kalin, M.D.

### Deputy Editors

Elisabeth Binder, M.D., Ph.D.

Kathleen T. Brady, M.D., Ph.D.

David A. Lewis, M.D.

Daniel S. Pine, M.D.

Carolyn Rodriguez, M.D., Ph.D.

Madhukar Trivedi, M.D.

### Associate Editors

Olusola Ajilore, M.D., Ph.D.

Huda Akil, Ph.D.

Melissa Arbuckle, M.D., Ph.D.

Eraka P.J. Bath, M.D.

Alan Brown, M.D., M.P.H.

Tyrone Cannon, Ph.D.

Karl Deisseroth, M.D., Ph.D.

Benjamin G. Druss, M.D., M.P.H.

Javier I. Escobar, M.D., M.Sc.

Julie L. Fudge, M.D.

Qiyong Gong, M.D., Ph.D.

Raquel E. Gur, M.D., Ph.D.

Helena Hansen, M.D., Ph.D.

David C. Henderson, M.D.

Yasmin Hurd, Ph.D.

Clinton D. Kilts, Ph.D.

Carlos López Jaramillo, M.D., M.Sc., Ph.D.

Joan L. Luby, M.D.

John C. Markowitz, M.D.

Helen S. Mayberg, M.D., F.R.C.P.C.

Terrie E. Moffitt, Ph.D.

Charles B. Nemeroff, M.D., Ph.D.

Roy Perlis, M.D.

Diego A. Pizzagalli, Ph.D.

Bryan L. Roth, M.D., Ph.D.

Alan F. Schatzberg, M.D.

Dikoma C. Shungu, Ph.D.

Anita Thapar, M.B.B.Ch., F.R.C.Psych.,

Ph.D., F.Med.Sci.

Mauricio Tohen, M.D., Dr.PH., M.B.A.

Giulio Tononi, M.D., Ph.D.

Nim Tottenham, Ph.D.

John T. Walkup, M.D.

### Editors Emeriti

Nancy C. Andreasen, M.D., Ph.D.

Robert Freedman, M.D.

### Former Editors

Amariah Brigham, M.D., 1844–1849

T. Romeyn Beck, M.D., 1849–1854

John P. Gray, M.D., 1854–1886

G. Alder Blumer, M.D., 1886–1894

Richard Dewey, M.D., 1894–1897

Henry M. Hurd, M.D., 1897–1904

Edward N. Brush, M.D., 1904–1931

Clarence B. Farrar, M.D., 1931–1965

Francis J. Braceland, M.D., 1965–1978

John C. Nemiah, M.D., 1978–1993

### Editorial Staff

#### Executive Editor

Michael D. Roy

#### Senior Editor

John J. Guardiano, Ph.D.

#### Production Manager

Susan Westrate

#### Staff Editors

Angela Moore

#### Editorial Support Services Manager

Heidi Koch-Bubel

#### Editorial Assistant

Linda LaCour

#### Editorial Assistant/Permissions

##### Coordinator

Megan Conley

### Publisher

John McDuffie



## PERSPECTIVES

---

### EDITOR'S NOTE

- 881 Depression and Schizophrenia: Sleep, Medical Risk Factors, Biomarkers, and Treatment**  
*Ned H. Kalin, M.D.*

### EDITORIALS

- 885 Surrogate Markers of Insulin Resistance in Predicting Major Depressive Disorder: Metabolism Metastasizes to the Brain**  
*Roger S. McIntyre, M.D.*
- 888 Clozapine, Long-Acting Injectables (and Polypharmacy?) Superior in U.S. and International Registries**  
*Stefan Leucht, M.D., Jari Tiihonen, M.D., Ph.D.*
- 890 Do the Benefits of Early Intervention Services for Psychosis Generalize and Persist in the Real World?**  
*Tyrone D. Cannon, Ph.D.*
- 893 Translational Mechanistic Biomarkers for the 21st Century**  
*Daniel C. Javitt, M.D., Ph.D.*

### REVIEWS AND OVERVIEWS

- 896 The Evolving Nexus of Sleep and Depression**  
*David T. Plante, M.D., Ph.D.*

Sleep and depression are deeply intertwined on numerous levels. Recent advances and scalability in the evaluation and treatment of sleep disorders has great promise for future advances in this area. The close longitudinal relationship between insomnia and depression offers the tantalizing opportunity to prevent depressive episodes using evidence-based treatments for insomnia, which would represent a paradigm shift for psychiatry.

- 903 Sleep Abnormalities in Schizophrenia: State of the Art and Next Steps**  
*Fabio Ferrarelli, M.D., Ph.D.*

A review of the evidence of the presence of sleep disturbances in schizophrenia shows how sleep alterations are associated with the clinical and cognitive dysfunctions of schizophrenia patients, and how treating sleep abnormalities may ameliorate the symptoms and improve the quality of life of these patients.

## NEW RESEARCH

---

### ARTICLES

- 914 Incident Major Depressive Disorder Predicted by Three Measures of Insulin Resistance: A Dutch Cohort Study**  
*Kathleen T. Watson, Ph.D., et al.* EDITORIAL

Major depressive disorder is a complex disorder with many potential causes. A study that included data from participants aged 18–65 years investigated whether insulin resistance is associated with an increased rate of incident MDD. The results indicate that a number of conditions associated with insulin resistance are predictive of incident MDD, potentially providing more avenues for evaluating risk for the development of MDD in patients with metabolic disorders.

**Articles, continued**

**921 Lyme Borreliosis and Associations With Mental Disorders and Suicidal Behavior: A Nationwide Danish Cohort Study**

*Brian A. Fallon, M.D., M.P.H., et al.* CME

Using a nationwide sample of people living in Denmark between 1994 and 2016 (N=6,945,837), U.S. and Danish researchers found the rates of mental disorders, affective disorders, suicide attempts, and suicide were each higher after a hospital diagnosis of Lyme borreliosis compared to the rest of the Danish population without a registered diagnosis of Lyme borreliosis. Temporal proximity to the diagnosis and number of episodes increased the rates of these adverse outcomes. Medical and mental health clinicians need to be aware of the potential mental health sequelae of this global infection.

**932 Differences in Antipsychotic Treatment Discontinuation Among Veterans With Schizophrenia in the U.S. Department of Veterans Affairs**

*Mark Weiser, M.D., et al.* EDITORIAL • CME

Observational data from more than 30,000 veterans with a history of schizophrenia were examined to address questions on the long-term acceptability of antipsychotic medications, with duration of treatment used as an index related to acceptability. This study, the largest to compare the clinical effectiveness of all antipsychotic medications used in the treatment of schizophrenia, offers insight into prescribing in clinical practice, enables effectiveness comparisons, and allows direct comparisons between oral and long-acting injectable formulations of the same medications.

**941 The Danish OPUS Early Intervention Services for First-Episode Psychosis: A Phase 4 Prospective Cohort Study With Comparison of Randomized Trial and Real-World Data**

*Christine Merrild Posselt, M.Sc., et al.* EDITORIAL • CME

An early intervention service for early-phase psychosis that involves family members and social skills training provided by a multidisciplinary team (which has been found superior than treatment as usual in controlled trials) was tested in real-world settings where it fared similarly well and in some cases better.

**952 Auditory Oddball Responses Across the Schizophrenia-Bipolar Spectrum and Their Relationship to Cognitive and Clinical Features**

*David A. Parker, Ph.D., et al.* EDITORIAL

A comprehensive examination of the clinical correlates of electrophysiologic response to an auditory oddball task among individuals from across the schizophrenia-bipolar spectrum clarifies their relationship to diagnostic categories, cognitive functioning, and clinical symptoms.

---

**OTHER ITEMS OF INTEREST**

**OFFICIAL ACTIONS**

**965 APA Council Reports**

**RESIDENTS' JOURNAL**

**983 Highlights From the Residents' Journal: September 2021**

**Cover:** In an issue devoted to aspects of depression and schizophrenia, Parker et al. (p. 952) used the auditory oddball paradigm to identify EEG features that distinguished diagnostic groups across the schizophrenia-bipolar spectrum from each other. Cover image comes from the authors' Figure 2, depicting grand average event-related potential waveforms by group for target frontal component trials, and from Figure 4, depicting the canonical discriminant analysis that identified three variates that best captured group differences.

# THE AMERICAN PSYCHIATRIC ASSOCIATION

800 Maine Avenue, S.W., Suite 900, Washington, D.C. 20024  
(888) 357-7924 (toll-free inside the U.S. and Canada)  
web site: [www.psychiatry.org](http://www.psychiatry.org) • e-mail: [apa@psych.org](mailto:apa@psych.org)

## Chairpersons of Councils, Committees, and Task Forces

### Standing Committees

|                             |                                 |
|-----------------------------|---------------------------------|
| <b>Bylaws</b>               | Edward R. Herman, J.D., M.D.    |
| <b>Elections</b>            | Justin W. Schoen, M.D.          |
| <b>Ethics</b>               | Charles Dike, M.D.              |
| <b>Finance and Budget</b>   | Ann T. Sullivan, M.D.           |
| <i>Audit</i>                | Ayana Jordan, M.D., Ph.D.       |
| <i>Investment Oversight</i> | Steven S. Sharfstein, M.D.      |
| <b>Joint Reference</b>      | Rebecca W. Brendel, M.D., J.D.  |
| <b>Membership</b>           | Kimberly A. Gordon-Achebe, M.D. |
| <b>Nominating</b>           | Jeffrey L. Geller, M.D., M.P.H. |
| <b>Tellers</b>              | Mariam F. Aboukar, D.O.         |

### Non-Standing Committee

|                             |                               |
|-----------------------------|-------------------------------|
| <b>Conflict of Interest</b> | Sandra M. DeJong, M.D., M.Sc. |
|-----------------------------|-------------------------------|

### Councils

#### Council on Addiction Psychiatry

Smita Das, M.D., M.P.H., Ph.D.

#### Council on Advocacy and Government Relations

Katherine G. Kennedy, M.D.

*Advocacy and Litigation Funding*

Bhasker J. Dave, M.D.

#### Council on Children, Adolescents, and Their Families

Gabrielle Shapiro, M.D.

*Women's Mental Health*

Ludmila B. De Faria, M.D.

#### Council on Communications

Isabel K. Norian, M.D.

#### Council on Consultation-Liaison Psychiatry

Sejal B. Shah, M.D.

#### Council on Geriatric Psychiatry

Maria D. Llorente, M.D.

#### Council on Healthcare Systems and Financing

Robert L. Trestman, M.D., Ph.D.

*Integrated Care*

Benjamin G. Druss, M.D.

*RBRVS, Codes and Reimbursement*

Gregory G. Harris, M.D.

*Reimbursement for Psychiatric Care*

Laurence H. Miller, M.D.

*Telepsychiatry*

James H. Shore, M.D.

#### Council on International Psychiatry and Global Health

David C. Henderson, M.D.

*Chester Pierce Human Rights Award Committee*

Michelle P. Durham, M.D., M.P.H.

#### Council on Medical Education and Lifelong Learning

Eindra Khin Khin, M.D.

*Innovation*

Nina Vasan, M.D.

*Scientific Program*

Catherine C. Crone, M.D.

*Scientific Program—Mental Health Services Conference*  
(Oct. to Oct. tenure)

Sarah Y. Vinson, M.D.

*Vestermark Award Committee*

Donna Marie Sudak, M.D.

*Well-being and Burnout*

Constance Guille, M.D.

#### Council on Minority Mental Health and Health Disparities

Walter Wilson, Jr., M.D.

#### Council on Psychiatry and Law

Debra A. Pinals, M.D.

*Judicial Action*

Reena Kapoor, M.D.

#### Council on Quality Care

Carol L. Alter, M.D.

*Mental Health Information Technology*

John Torous, M.D.

*Quality and Performance Measurement*

David S. Kroll, M.D.

*Practice Guidelines*

Daniel J. Anzia, M.D.

#### Council on Research

Jonathan E. Alpert, M.D., Ph.D.

*Climate Change and Mental Health*

Elizabeth Haase, M.D.

*Psychiatric Dimensions of Disasters*

Joshua C. Morganstein, M.D.

# The American Psychiatric Association Publishing Textbook of Substance Use Disorder Treatment, Sixth Edition

Edited by Kathleen T. Brady, M.D., Ph.D., Frances R. Levin, M.D.,  
Marc Galanter, M.D., and Herbert D. Kleber, M.D.

JUST PUBLISHED!

A robust revision, including many entirely new chapters addressing policy, the latest treatment approaches, and special topics, the Sixth Edition of *The APA Publishing Textbook of Substance Use Disorder Treatment* offers a comprehensive and compelling review of this ever-evolving field. New sections address important topics that have gained prominence or become the focus of increased research attention since the Fifth Edition was released. For example, substance use and other psychiatric disorders often co-occur, and the resulting dual disorder is frequently associated with greater symptom severity and worse long-term prognosis than either disorder alone. Accordingly, the section on psychiatric comorbidity covers the epidemiology, assessment, and treatment of substance use disorders (SUDs) that co-occur with psychotic, mood, anxiety, eating, attention-deficit/hyperactivity, or trauma-related disorders.

The section devoted to special populations has been revamped, and the topics have been thoroughly updated, some now covered by new contributors and others completely new to this edition. SUDs among women (including perinatal issues), adolescents, patients with chronic pain, sexual and gender minority populations, and older adults are addressed in detailed chapters, as are behavioral addictive disorders and cross-cultural aspects of substance-related and addictive disorders.

Finally, the editors have included a section devoted to critically important topics in public health, including the U.S. opioid epidemic, cannabis policy and use, HIV/AIDS and hepatitis C, nicotine and public health, and the prevention of SUDs.

Evidence-based, down to earth, and meticulously edited, the new Sixth Edition of *The APA Publishing Textbook of Substance Use Disorder Treatment* is an essential resource for clinicians who treat SUDs in a variety of settings—from examining rooms to emergency departments, and from hospitals to recovery facilities.

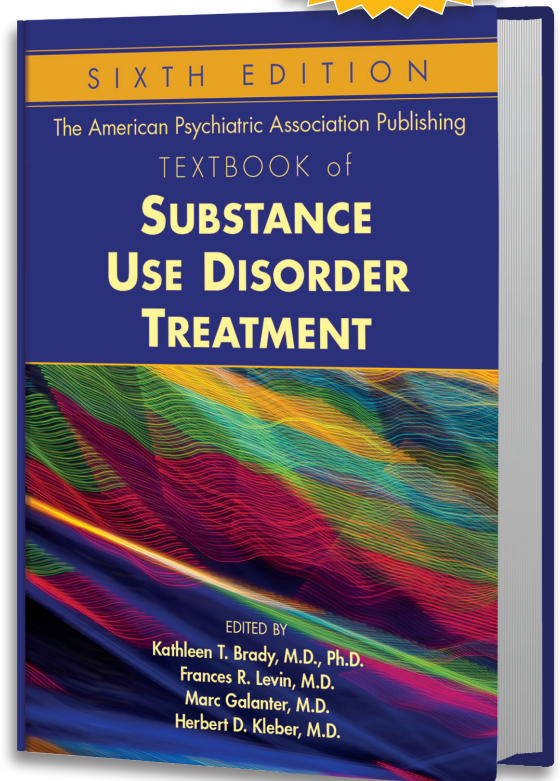

2021 • 912 pages • ISBN 978-1-61537-221-8 • Hardcover • \$215.00 • Item #37221

2021 • 912 pages • ISBN 978-1-61537-353-6 • eBook • \$175.00 • Item #37353

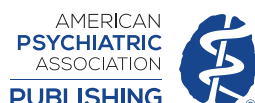

ORDER @ [www.appi.org](http://www.appi.org) | Email: [appi@psych.org](mailto:appi@psych.org) | Toll Free: 1-800-368-5777

20% Discount for American Psychiatric Association Members

25% Discount for APA Resident-Fellow Members

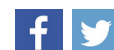

# The American Journal of Psychiatry

## Residents' Journal

[ajp.psychiatryonline.org/loi/ajp-rj](http://ajp.psychiatryonline.org/loi/ajp-rj)

### September 2021 | Volume 17, Issue 1

- 2** The *Residents' Journal*, Our Journal  
Austin Blum, J.D., M.D., Editor-in-Chief
- 3** Redeployed to the COVID-19 Unit: A Psychiatry  
Resident's Perspective  
Samuel Reinfeld, D.O.
- 4** Grappling With Grief: Approaching Loss During the  
COVID-19 Pandemic  
Elizabeth Kim, B.S.
- 6** The Gym Unit  
Apurva Bhatt, M.D.
- 7** Adrafinil: Psychostimulant and Purported Nootropic?  
Danielle W. Lowe, M.D., Ph.D., Eric Dobson, M.D.,  
Amanda G. Jewett, Pharm.D., and Emily E. Whisler, D.O.
- 10** Lost in Untranslation: The Challenge of Translated and  
Untranslated Writings Throughout Psychiatry's History  
Deborah Y. Park, B.S., and Jeremy Weleff, D.O.

#### ANNOUNCEMENTS

- 5** Call for Papers on Minority Mental Health and Diversity

The *Residents' Journal* is an e-publication that serves as a forum for sharing ideas and experiences in training, clinical practice, research, and careers.

The *Residents' Journal* considers manuscripts authored by medical students, resident physicians, and fellows. For information about submitting manuscripts, visit the **Author Resources** page online: [https://ajp.psychiatryonline.org/residents\\_journal/rj\\_ifora](https://ajp.psychiatryonline.org/residents_journal/rj_ifora).

### 2021–2022 Editorial Board

#### Editor-in-Chief:

Austin Blum, M.D., J.D.

#### Senior Deputy Editor:

Danielle Lowe, M.D., Ph.D.

#### Deputy Editors:

Fiona Fonseca, M.D.

Colin Wendt, M.D.

Matthew Yung, M.D.

#### Associate Editors:

Nina Bihani, M.D.

Maria Chuop, M.D.

Brittany Gouse, M.D., M.P.H.

Syeda Razia (Ray) Haider, M.D.

Joshua Hamilton, M.D.

Alexander Levit, M.D., Ph.D.

Amanda Mihalik-Wenger, M.D.

Aaron Owen, M.D.

#### Media Editors:

Barrington Hwang, M.D. (*Senior Media Editor*)

Sabina Grech, M.D.

Blake Novy, M.D.

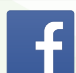

Find us on Facebook

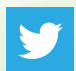

Follow @APAPubJournals

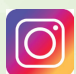

Find us on Instagram

AMERICAN  
PSYCHIATRIC  
ASSOCIATION  
PUBLISHING

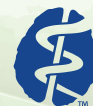

[www.appi.org](http://www.appi.org)

# Go Online

Visit [ajp.psychiatryonline.org](http://ajp.psychiatryonline.org) for these features!

## AJP in Advance

*Discover the latest research advances before they appear in print*

### **On the Genetic and Environmental Relationship Between Suicide Attempt and Death by Suicide**

Records from more than 11,000 active duty enlisted soldiers with documented suicidal ideation and no prior documented suicide attempts were reviewed to examine risk factors for suicide attempt within the first month after a diagnosis of suicidal ideation. Suicide attempt risk was highest in the first 30 days following ideation diagnosis and was more likely among women, combat medics, and soldiers who had an anxiety disorder diagnosis before suicidal ideation and a same-day sleep disorder diagnosis.

### **Differential Patterns of Delayed Emotion Circuit Maturation in Abused Girls With and Without Internalizing Psychopathology**

A multisite study of 246 girls younger than 18 years attempted to ascertain the patterns of brain development linking abuse and internalizing disorders. Girls were described as typically developing (no abuse, no diagnoses), resilient (abuse, no diagnoses), or susceptible (abuse, diagnoses). Abused girls showed delayed development of emotion-related circuits compared to typically-developing girls, driven by different patterns of brain development depending on whether there was an internalizing diagnosis or not.

## AJP CME

*Earn CME credit: 3 courses per issue*

You can earn CME credits by reading articles in *The American Journal of Psychiatry*. Three articles in this issue form a short course that consists of reading the article and answering three multiple-choice questions with a single correct answer for up to 1 *AMA PRA Category 1 Credit*<sup>™</sup> each. Credit is issued only to subscribers of the online AJP CME Course Program.

See the table below for the articles in this month's issue that are the subject of a CME quiz.

#### **In this issue**

Lyme Borreliosis and Associations With Mental Disorders and Suicidal Behavior: A Nationwide Danish Cohort Study (p. 921)

Differences in Antipsychotic Treatment Discontinuation Among Veterans With Schizophrenia in the U.S. Department of Veterans Affairs (p. 932)

The Danish OPUS Early Intervention Services for First-Episode Psychosis: A Phase 4 Prospective Cohort Study With Comparison of Randomized Trial and Real-World Data (p. 941)

## History of Psychiatry

*Revisit the field's rich history through the AJP Archive*

### **125 years ago this month: Then and Now, Being Pictures From the Past**

W. W. Godding recounts his first professional meeting at which he encountered luminaries of the Association's more recent past, a past from which he jokingly adds that he himself has emerged, seeing as his picture and biographical sketch featured in the *Journal* 6 years earlier resembled an obituary to many.

@APAPubJournals

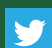

Psychiatry Online

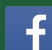

AMERICAN  
PSYCHIATRIC  
ASSOCIATION  
PUBLISHING

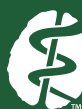

[www.appi.org](http://www.appi.org)  
1-800-368-5777  
[appi@psych.org](mailto:appi@psych.org)

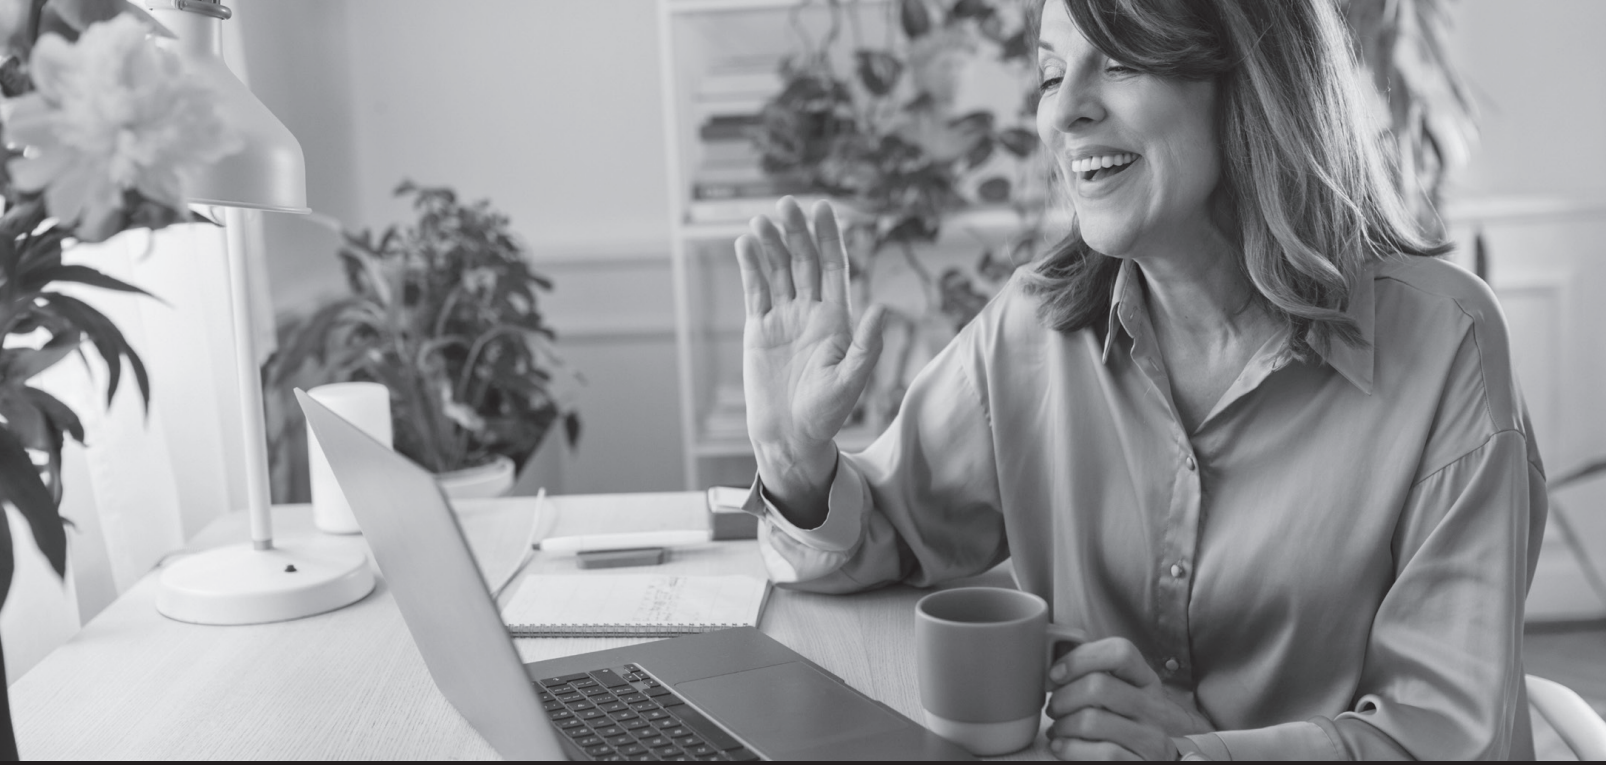

# We've Got You Covered

## American Psychiatric Association Endorsed Professional Liability Insurance Program

Designed for Psychiatrists in all practice settings

**DID YOU KNOW? We find that our policyholders are more likely to receive a board complaint than be named in a claim or lawsuit.**

Most insurance policies provided by employers do not include reimbursement for costs incurred to defend a complaint (or have limits that may be shared with others).

Not to worry... we include up to \$50,000 of defense reimbursement – with the option to increase this limit to \$150,000.

What's more, coverage for **Telepsychiatry** is provided, subject to the terms and conditions of the policy.

Cyber Coverage is available as an endorsement at renewal or on a new American Professional Agency policy. Available in most states on an admitted basis.

*(All discounts, coverage features and rating are subject to individual state approval.)*

Visit us at [apamalpractice.com](http://apamalpractice.com) or call **877-740-1777** to learn more.

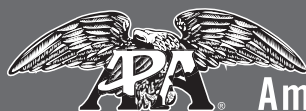

**American Professional Agency**

LEADERS IN PSYCHIATRIC MEDICAL LIABILITY INSURANCE

AMERICAN  
PSYCHIATRIC  
ASSOCIATION

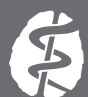

Source: https://psychiatryonline.org/doi/suppl/10.1176/ajp.2021.178.issue-10/suppl_file/front.pdf
